# Supplementary material for: Lysosome targeting, Cr(vi) and l-AA sensing, and cell imaging based on N-doped blue-fluorescence carbon dots
Source: Royal Society of Chemistry journal article supplement (doi:10.1039/d1ay00977j), 2021-01-01
Supplement: d1ay00977j1.pdf [file d1ay00977j1.pdf]

## Supplementary Materials for:

### Lysosome targeting, Cr(VI) and L-AA sensing, and cell imaging based on N-doped blue-fluorescence carbon dots

Lihong Shi <sup>a,\*</sup>, Xiaorui Dong<sup>a</sup>, Guomei Zhang<sup>a</sup>, Yan Zhang<sup>a</sup>, Caihong Zhang<sup>a</sup>, Chuan Dong<sup>a</sup>,  
Shaomin Shuang<sup>a,\*</sup>

#### Fluorescence QY measurements

The relative fluorescence QY( $\Phi$ ) of N-CDs was calculated using the equation of  $\Phi_x = \Phi_{\text{std}} I_x A_{\text{std}} \eta_x^2 / (I_{\text{std}} A_x \eta_{\text{std}}^2)$ . Quinine sulfate in 0.1 M H<sub>2</sub>SO<sub>4</sub> was chosen as a reference with a quantum yield ( $\Phi_{\text{std}}$ ) of 0.54 at 360 nm. In the equation,  $I_x$  and  $I_{\text{std}}$  are FL intensities of N-CDs and the reference, respectively.  $A_x$  and  $A_{\text{std}}$  denote the optical densities of N-CDs and the reference, respectively.  $\eta_x$  and  $\eta_{\text{std}}$  represent the refractive indices of N-CDs and the reference, respectively. The absorbances of all samples in a 1.0 cm cuvette were kept under 0.1 at excitation wavelength to minimize re-absorption effects.

#### MTT assay

For cell cytotoxicity test, HeLa cells were first plated on a Costar 96-well tissue-culture cluster and cultured at 37°C with 5% CO<sub>2</sub> in air for 3 h to adhere cells onto the surface. The well without cells and treatment with N-CDs was taken as a zero set. The medium was then changed with 100  $\mu$ L of fresh DMEM supplemented with 10% FBS containing N-CDs, and cells were allowed to grow for another 24 h. At least five parallel samples were performed in each group. Cells without treatment with N-CDs were taken as a control. After adding 20  $\mu$ L of 5.0 mg mL<sup>-1</sup> MTT reagent into individual well, the cells were further incubated for 4 h, followed by removing the culture medium

---

<sup>a</sup> College of Chemistry and Chemical Engineering, Shanxi University,  
Taiyuan, 030006, PR China

\* Corresponding author. E-mail address: shilihong@sxu.edu.cn,  
smshuang@sxu.edu.cn.

with MTT, and then 150  $\mu$ L of DMSO was added. The resulting mixture was shaken for 10 min at room temperature. The OD of the mixture was measured at 490 nm with a SunRisemicroplate reader (Tecan Austria GmbH, Grödig, Austria). The cell viability was estimated using the equation of Cell Viability (%) =  $(OD_{\text{Treated}}/OD_{\text{Control}}) \times 100\%$ , where  $OD_{\text{Control}}$  and  $OD_{\text{Treated}}$  were obtained in absence and presence of N-CDs, respectively.

### **Synthesis process of N-CDs**

Blue-fluorescence N-CDs were fabricated through hydrothermal carbonization of folic acid and p-phenylenediamine. The formation process of N-CDs likely involve decomposition, polymerization, carbonization, and nuclear burst. Firstly, folic acid and p-phenylenediamine formed intermediates through dehydration and decomposition. Afterwards, these intermediates were polymerized, carbonized and aromatized to form aromatic clusters. Simultaneously, the aromatic clusters may undergo nuclear explosions to form N-CDs. To get good FL properties, we investigated the influence of reaction temperature and time on FL properties of resultant N-CDs. As shown in Fig. S1, the optimum reaction condition for N-CDs is 220°C for 4 h.

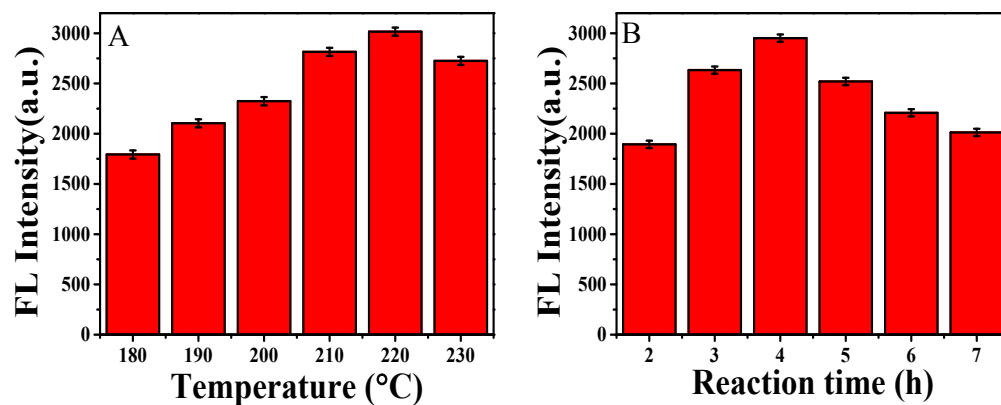

**Fig. S1** FL intensity of N-CDs prepared under different reaction temperature (A) and time (B).

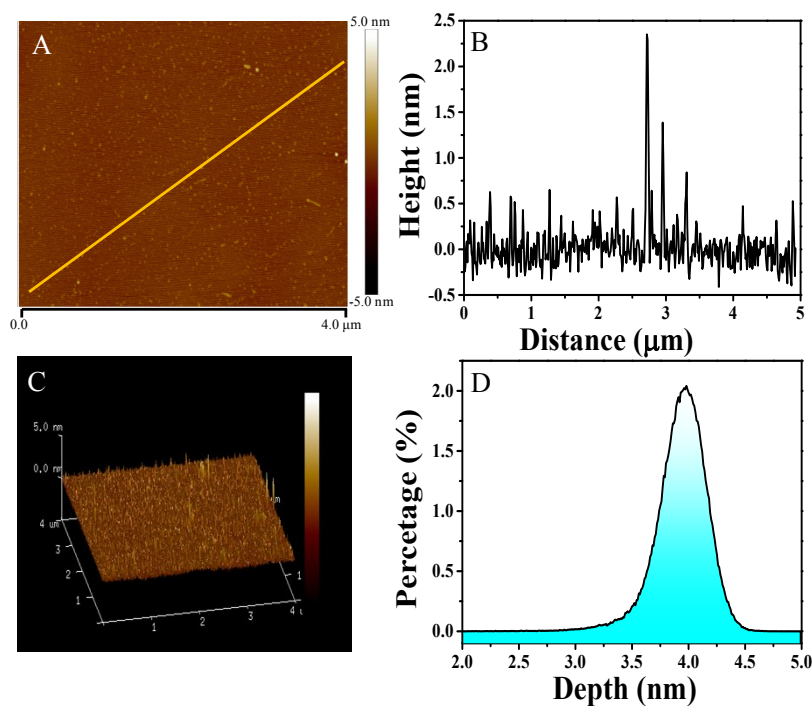

**Fig. S2** (A) AFM topographic image of N-CDs. (B) Distribution of height profile along line in AFM topographic image. (C) AFM three-dimensional image of N-CDs. (D) The height distribution of N-CDs.

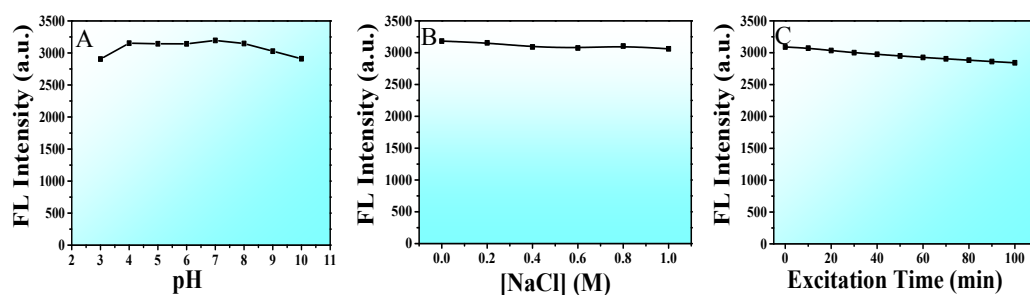

**Fig. S3** (A) Effect of pH on FL intensity of N-CDs. (B) Effect of NaCl concentration on FL intensity of N-CDs. (C) Effect of excitation time on FL intensity of N-CDs.

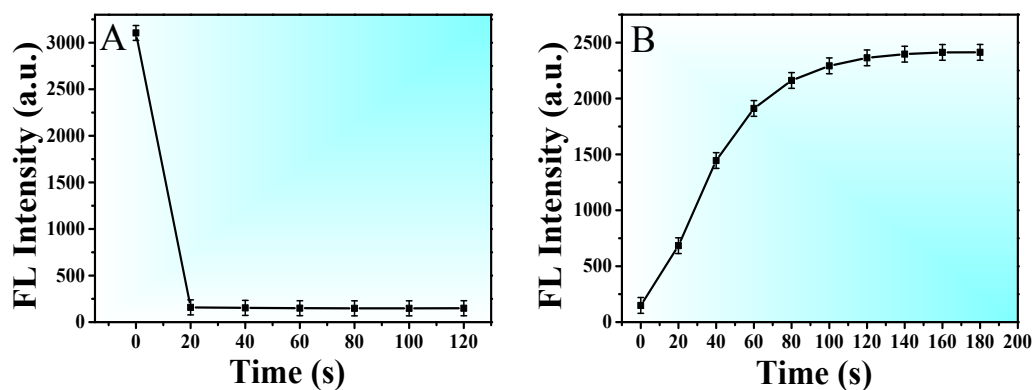

**Fig. S4** (A) Time-dependence of FL intensity of N-CDs/Cr(VI) under 360 nm excitation. (B) Time-dependence of FL intensity of N-CDs/Cr(VI)/L-AA solution under 360 nm excitation.

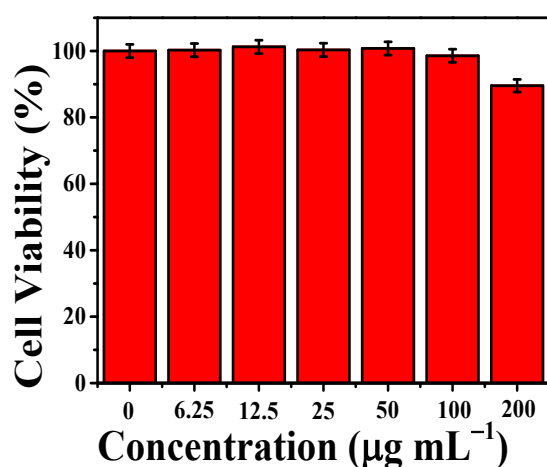

**Fig. S5** Toxic effect of N-CDs on HeLa cells.

**Table S1** Comparison of different CDs based Cr(VI) probes.

| Fluorescent probes | CDs precursor                                              | Linear range ( $\mu\text{M}$ ) | Detection limit (nM) | Ref.      |
|--------------------|------------------------------------------------------------|--------------------------------|----------------------|-----------|
| CDs                | waste tea extract                                          | 1.9–115.4                      | 810                  | [1]       |
| CDs                | flax straw, EDA                                            | 0.5–80                         | 190                  | [2]       |
| Ag-doped CDs       | FA, PE, AgNO <sub>3</sub>                                  | 0.1–6                          | 43.7                 | [3]       |
| CDs                | m-phenylenediamine, citric acid                            | 0–5                            | 140                  | [4]       |
| N-CDs              | citric acid, ethylenediamine                               | 0–10                           | 260                  | [5]       |
| CDs                | 4-aminoacetanilide, hydrochloride, 4-acetamidobenzaldehyde | 1–400                          | 130                  | [6]       |
| P,N-CDs            | EDA, ethylenediamine                                       | 7–70                           | 710                  | [7]       |
| N-CDs              | folic acid, p-phenylenediamine                             | 0.10–150                       | 9.4                  | This work |

**Table S2** Comparison of various CDs based L-AA probes.

| Fluorescent probes               | CDs precursor                                 | Linear range ( $\mu\text{M}$ ) | Detection limit ( $\mu\text{M}$ ) | Ref.      |
|----------------------------------|-----------------------------------------------|--------------------------------|-----------------------------------|-----------|
| Tea-CDs/Cr(VI)                   | waste tea extract                             | 500–5000                       | 87.02                             | [1]       |
| CDs/Cr(VI)                       | flax straw, EDA                               | 0–200                          | 0.35                              | [2]       |
| S,N-CDs/Cr(VI)                   | glucose, H <sub>2</sub> SO <sub>4</sub> , EDA | 6.6–892                        | 0.076                             | [8]       |
| CDs/NO <sub>2</sub> <sup>-</sup> | nicotinic acid, folic acid                    | 0.1–800                        | 50                                | [9]       |
| N-CDs/Cr(VI)                     | CA, Glu                                       | 1–750                          | 0.3                               | [10]      |
| N-CDs/Cr(VI)                     | p-PD, ammonia                                 | 5–50                           | 0.32                              | [11]      |
| CDs@EDTA/Cr(VI)                  | orange peels, EDTA                            | 0.1–400                        | 0.1                               | [12]      |
| N-CDs/Cr(VI)                     | folic acid, p-phenylenediamine                | 750–2250                       | 25                                | This work |

## References

- 1 K. Chen, W. X. Qing, W. P. Hu, M. H. Lu, Y. Wang and X. H. Liu, *Spectrochim. Acta. A*, 2019, **213**, 228–234.
- 2 G. K. Hu, L. Ge, Y. Y. Li, M. Mukhtar, B. Shen, D. S. Yang and J. G. Li, *J. Colloid Interface Sci.*, 2020, **579**, 96–108.
- 3 B. Hu, Y. Ma and N. Wang, *Microchem. J.*, 2020, **157**, 104855.
- 4 G. X. Qiao, D. Lu, Y. P. Tang, J. W. Gao and Q. M. Wang, *Dyes Pigm.*, 2019, **163**, 102–110.
- 5 S. H. Liu, J. L. Cui, J. B. Huang, B. S. Tian, F. Jia and Z. L. Wang, *Spectrochim. Acta. A*, 2019, **206**, 65–71.
- 6 F. P. Mutuyimana, J. Liu, S. Nsanzamahoro, M. Na, H. L. Chen and X. G. Chen, *Microchim. Acta*, 2019, **186**, 163.
- 7 B. Wu, X. F. Shi, W. Han, T. S. Wang, C. R. Wang and L. Jiang, *RSC Adv.*, 2018, **8**, 31793–31802.
- 8 S. M. Song, F. Liang, M. L. Li, F. F. Du, W. J. Dong, X. J. Gong, S. M. Shuang and C. Dong, *Spectrochim. Acta. A*, 2019, **215**, 58–68.
- 9 L. L. Gan, Q. Su, Z. B. Chen and X. M. Yang, *Appl. Surf. Sci.*, 2020, **530**, 147269.
- 10 Y. H. Zhang, X. Fang, H. Zhao and Z. X. Li, *Talanta*, 2018, **181**, 318–325.
- 11 Y. T. Meng, Y. Jiao, Y. Zhang, Y. Li, Y. F. Gao, W. J. Lu, Y. Liu, S. M. Shuang and C. Dong, *Talanta*, 2020, **210**, 120653.
- 12 M. Wang, R. Shi, M. J. Gao, K. L. Zhang, L. L. Deng, Q. F. Fu, L. J. Wang and D. Gao, *Food Chem.*, 2020, **318**, 126506.
